# Supplementary material for: Capacity and use of diagnostics and treatment for patients with severe acute respiratory infections in the pre-COVID-19 era in district and provincial hospitals in Viet Nam
Source: PubMed Central journal article supplement (PMC8873919; doi:10.5365/wpsar.2021.12.4.835), 2021-11-30
Supplement: wpsar-12-835-s001.pdf [file wpsar-12-835-s001.pdf]

Appendix Fig. 1. Flow chart of study population

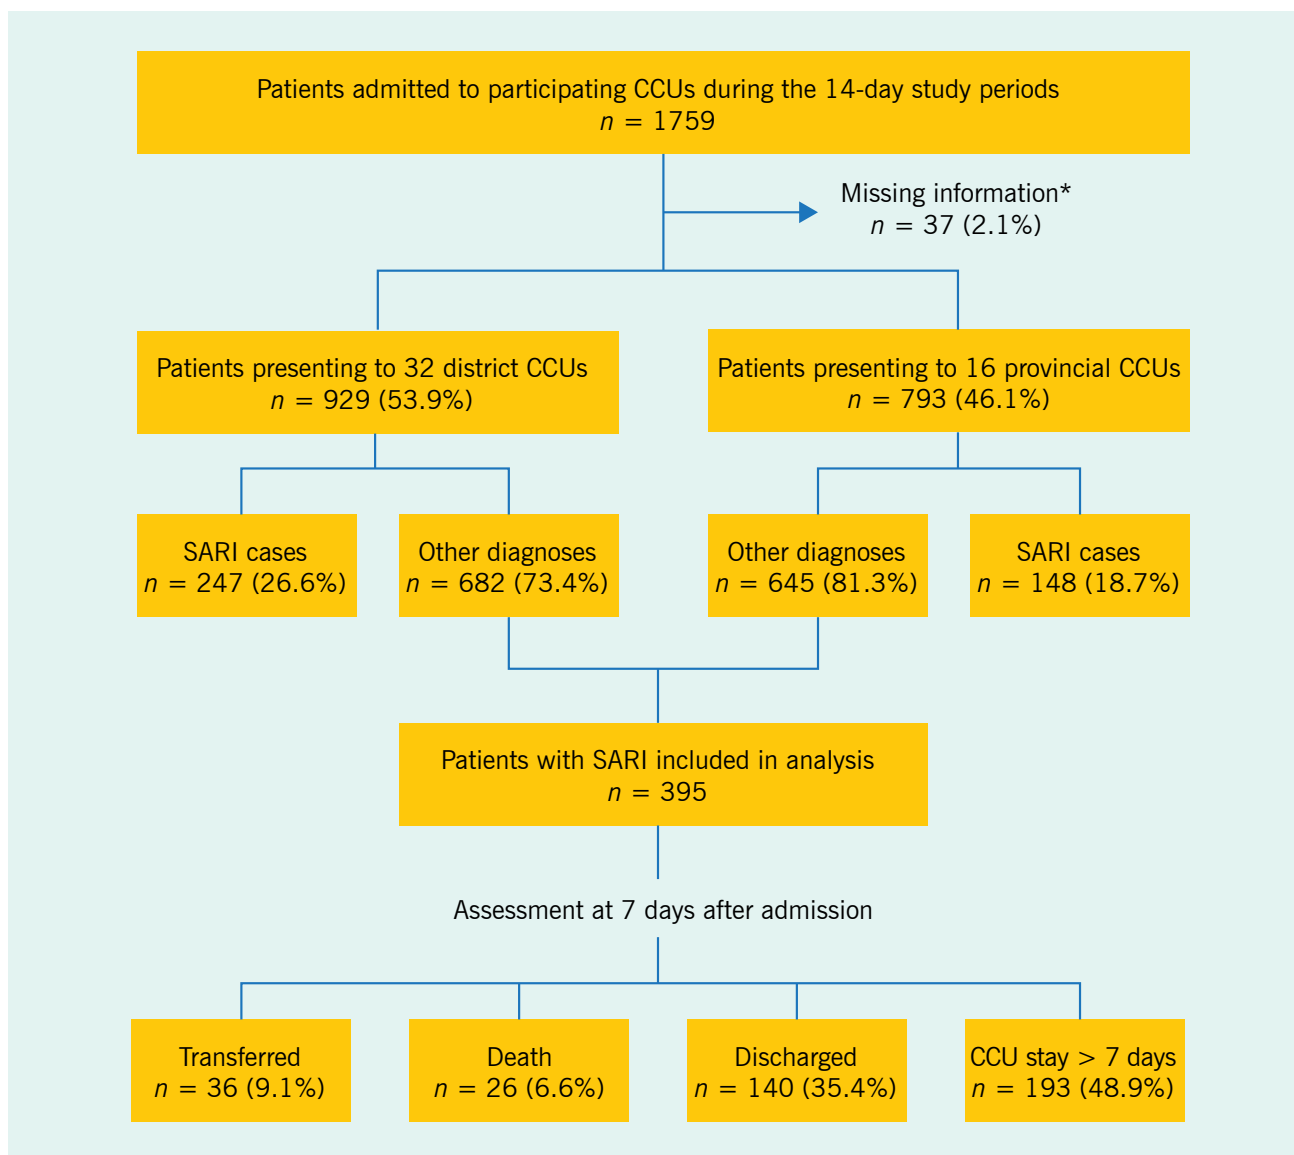

\* Missing information on diagnosis and/or time of symptom onset.
